# Supplementary material
Source: ML conference proceedings conference paper supplement (https://openaccess.thecvf.com/content/CVPR2026/html/Liu_DRS-GUI_Dynamic_Region_CVPR_2026_paper.html)
Supplement: Supplementary file 1 [file Liu_DRS-GUI_Dynamic_Region_CVPR_2026_supplemental.pdf]

# DRS-GUI: Dynamic Region Search for Training-Free GUI Grounding

## Supplementary Material

### 1. Pseudo-code of Perceptual Actions

We first provide the pseudo-code of the three perceptual actions used in DRS-GUI, namely FOCUS, SCATTER, and SHIFT. These actions operate on parsed UI elements and are used by the MCTS-based planner to progressively refine, expand, or relocate the current region during dynamic region search.

---

**Algorithm 1** Focus Perceptual Action

---

**Input:** GUI image  $I$ ; current region  $R$  with bbox  $B_R$ ; instruction  $T$ ; UI elements inside  $R$ :  $U_R = \{u_i = [b_i, d_i, i_i]\}$ ; similarity scores  $\{s_i\}$ ; semantic top-ratio  $p$ ; target shrink ratio  $\rho_{\text{focus}}$ .

**Output:** Focused region  $R_{\text{focus}}$ .

```
 $U_{\text{top}} \leftarrow \text{TopKSemantic}(U_R, \{s_i\}, p)$ 
if  $|U_{\text{top}}| = 0$  then
  return  $R$ 
end if
 $U_{\text{cluster}} \leftarrow \text{ClusterNoOutlier}(U_{\text{top}})$ 
if  $|U_{\text{cluster}}| = 0$  then
   $U_{\text{cluster}} \leftarrow \{\arg \max_{u_i \in U_{\text{top}}} s_i\}$ 
end if
 $U_{\text{focus}} \leftarrow \text{ShrinkWithin}(U_{\text{cluster}}, B_R, \rho_{\text{focus}})$ 
 $R_{\text{focus}} \leftarrow \text{BBoxUnion}(U_{\text{focus}})$ 
return  $R_{\text{focus}}$ 
```

---

### 2. Region Quality Reward Hyper-parameters

We further study how the three reward weights affect DRS-GUI by independently varying the coefficients of *Interaction Weighted Relevance* ( $\alpha$ ), *UI Coverage Consistency* ( $\beta$ ), and *Semantic Concentration* ( $\gamma$ ) in the composite reward  $r(R, T)$  and reporting accuracy on the ScreenSpot-V2 Mobile, Desktop, and Web splits. As shown in Fig. 1, performance changes smoothly as each weight sweeps from 0.1 to 0.5. Accuracy consistently improves when increasing the contribution of interaction-weighted relevance (top row), is moderately sensitive to the coverage term (middle row), and shows a milder, peaked response to the semantic concentration weight (bottom row). Overall, the curves stay relatively flat around mid-range settings, suggesting that DRS-GUI is robust to moderate changes of  $\alpha$ ,  $\beta$ , and  $\gamma$ .

### 3. Efficiency and Robustness Analysis

We further analyze the computational overhead, component dependency, and general applicability of DRS-GUI. Since DRS-GUI introduces UI perception and MCTS-based region search before a single grounding call, it is important

---

**Algorithm 2** Scatter Perceptual Action

---

**Input:** Full GUI image  $I$ ; current region  $R$  with bbox  $B_R$ ; global UI elements  $U = \{u_i = [b_i, d_i, i_i]\}$ ; similarity scores  $\{s_i\}$ ; semantic top-ratio  $p$ ; ring scale  $\lambda_{\text{ring}}$ ; max area scale  $\kappa_{\text{max}}$ ; max IoU threshold  $\eta_{\text{max}}$ .

**Output:** Expanded region  $R_{\text{scatter}}$ .

```
 $U_{\text{out}} \leftarrow \{u_i \in U \mid \text{Center}(b_i) \text{ is strictly outside } B_R\}$ 
if  $|U_{\text{out}}| = 0$  then
   $R_{\text{scatter}} \leftarrow \text{ScaleAroundCenter}(B_R, \lambda_{\text{ring}})$ 
  return  $R_{\text{scatter}}$ 
end if
 $U_{\text{cand}} \leftarrow \text{TopKSemantic}(U_{\text{out}}, \{s_i\}, p)$ 
 $U_{\text{exp}} \leftarrow \text{ExpandWithin}(U_{\text{cand}}, B_R, \kappa_{\text{max}})$ 
if  $|U_{\text{exp}}| > 0$  then
   $B_{\text{new}} \leftarrow \text{BBoxUnion}(\{B_R\} \cup U_{\text{exp}})$ 
  if  $\text{Area}(B_{\text{new}}) > \text{Area}(B_R)$  and  $\text{IoU}(B_{\text{new}}, B_R) \leq \eta_{\text{max}}$  then
     $R_{\text{scatter}} \leftarrow B_{\text{new}}$ 
  return  $R_{\text{scatter}}$ 
end if
end if
 $R_{\text{scatter}} \leftarrow \text{ScaleAroundCenter}(B_R, \lambda_{\text{ring}})$ 
return  $R_{\text{scatter}}$ 
```

---

to examine both its efficiency and its robustness to different external components and base models.

### 3.1. Inference overhead and rollout budget

Table 1 reports the effect of the rollout budget  $N$  on ScreenSpot-Pro accuracy and inference latency. DRS-GUI introduces additional overhead from UI perception and region planning, but still preserves a favorable accuracy-latency trade-off because the base MLLM is invoked only once on the selected region. As  $N$  increases, accuracy improves steadily from  $N=1$  to  $N=8$ , while latency grows roughly linearly. At  $N=12$ , performance largely saturates, suggesting that a moderate rollout budget already captures most of the gains even on challenging high-resolution GUIs.

Table 1. Effect of rollout budget  $N$  on ScreenSpot-Pro accuracy and inference latency (s/sample).

| Model         | $N$ | Dev  | Cre  | CAD  | Sci  | Office | OS   | Avg  | Lat. |
|---------------|-----|------|------|------|------|--------|------|------|------|
| Qwen2.5-VL-7B | -   | 26.1 | 24.0 | 13.0 | 31.1 | 45.2   | 23.5 | 26.8 | 12.8 |
| + DRS-GUI     | 1   | 30.1 | 27.0 | 19.2 | 33.5 | 48.7   | 28.1 | 30.6 | 13.6 |
| + DRS-GUI     | 4   | 35.1 | 35.2 | 29.9 | 38.2 | 54.3   | 35.7 | 37.6 | 20.0 |
| + DRS-GUI     | 8   | 37.5 | 38.7 | 34.1 | 41.0 | 57.4   | 39.3 | 40.9 | 27.1 |
| + DRS-GUI     | 12  | 36.8 | 38.7 | 35.3 | 40.2 | 56.5   | 38.3 | 40.5 | 36.8 |

### 3.2. Dependency on parser and embedding models

Table 2 evaluates DRS-GUI under different parser and embedding settings on ScreenSpot-V2. P1/P2 denote Omni-Parser v1/v2, where P1 is weaker and more prone to miss-

### Algorithm 3 Shift Perceptual Action

**Input:** Full GUI image  $I$ ; current region  $R$  with bbox  $B_R$ ; global UI elements  $U = \{u_i = [b_i, d_i, i_i]\}$ ; similarity scores  $\{s_i\}$ ; semantic top-ratio  $p$ ; min shift ratio  $\rho_{\text{shift}}$ ; padding size  $\delta_{\text{pad}}$ ; contain threshold  $\theta_{\text{contain}}$ ; max IoU threshold  $\eta_{\text{shift}}$ .

**Output:** Shifted region  $R_{\text{shift}}$ .

```

 $U_{\text{out}} \leftarrow \{u_i \in U \mid \text{Center}(b_i) \text{ is strictly outside } B_R\}$ 
if  $|U_{\text{out}}| = 0$  then
     $R_{\text{shift}} \leftarrow \text{ScatterAction}(I, R, U, \{s_i\})$ 
    return  $R_{\text{shift}}$ 
end if
 $U_{\text{top}} \leftarrow \text{TopKSemantic}(U_{\text{out}}, \{s_i\}, p)$ 
 $c_R \leftarrow \text{Center}(B_R)$ 
 $D_R \leftarrow \text{DiagLength}(B_R)$ 
 $d_{\text{min}} \leftarrow \rho_{\text{shift}} \cdot D_R$ 
 $U_{\text{far}} \leftarrow \{u_i \in U_{\text{top}} \mid \|\text{Center}(b_i) - c_R\|_2 \geq d_{\text{min}}\}$ 
if  $|U_{\text{far}}| = 0$  then
     $R_{\text{shift}} \leftarrow \text{ScatterAction}(I, R, U, \{s_i\})$ 
    return  $R_{\text{shift}}$ 
end if
 $\{G_d\} \leftarrow \text{GroupByDirection}(U_{\text{far}}, B_R)$ 
 $U_{\text{shift}} \leftarrow \arg \max_{G_d} |G_d|$ 
 $B_{\text{shift}}^{(0)} \leftarrow \text{BBoxUnion}(U_{\text{shift}})$ 
 $B_{\text{shift}} \leftarrow \text{PadBox}(B_{\text{shift}}^{(0)}, \delta_{\text{pad}})$ 
if  $\text{IoU}(B_R, B_{\text{shift}}) > \theta_{\text{contain}}$  or  $\text{IoU}(B_{\text{shift}}, B_R) > \eta_{\text{shift}}$  then
     $R_{\text{shift}} \leftarrow \text{ScatterAction}(I, R, U, \{s_i\})$ 
    return  $R_{\text{shift}}$ 
end if
 $R_{\text{shift}} \leftarrow B_{\text{shift}}$ 
return  $R_{\text{shift}}$ 

```

ing elements, and E1/E2 denote SBERT-NLI-large versus our instruction-guided embedding.

The results show two consistent trends. First, stronger UI parsing and better instruction-aware embedding improve region scoring and therefore improve final grounding accuracy. Second, DRS-GUI remains effective even under the weaker parser setting (P1+E2), indicating that the method is not overly brittle to parser misses. This is because the parser is only used to guide iterative region search rather than to directly determine the final prediction. The final coordinates are still predicted by the grounding model after multiple search steps, which helps mitigate errors introduced by imperfect external components.

Table 2. Parser and embedding ablations on ScreenSpot-V2. P1/P2 denote OmniParser v1/v2, and E1/E2 denote SBERT-NLI-large versus our instruction-guided embedding.

| Method        | Mobile      |             | Desktop     |             | Web         |             | Avg.        |
|---------------|-------------|-------------|-------------|-------------|-------------|-------------|-------------|
|               | Text        | Icon/Widget | Text        | Icon/Widget | Text        | Icon/Widget |             |
| UGround-V1-7B | 95.0        | 83.3        | 95.0        | 77.8        | 92.1        | 77.2        | 87.6        |
| + P1+E1       | 93.8        | 84.4        | 90.7        | 80.0        | 91.5        | 83.7        | 88.2        |
| + P1+E2       | 96.2        | 87.7        | 94.3        | 83.6        | 93.6        | 87.2        | 91.2        |
| + P2+E2       | <b>96.6</b> | <b>88.2</b> | <b>94.9</b> | <b>84.3</b> | <b>94.0</b> | <b>87.7</b> | <b>91.8</b> |

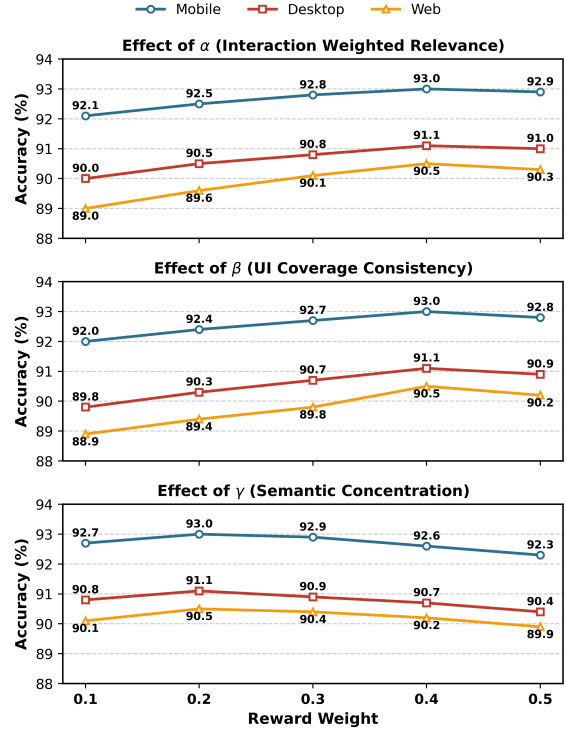

Figure 1. Sensitivity of DRS-GUI to reward weights  $\alpha$ ,  $\beta$ , and  $\gamma$  on the ScreenSpot-V2 Mobile, Desktop, and Web splits. Accuracy varies smoothly with each weight and peaks near mid-range settings, indicating robustness of the reward design.

### 3.3. Comparison with zoom-in methods and stronger agents

Table 3 compares DRS-GUI with representative zoom-in methods, recent GUI grounding approaches, and stronger GUI agents on ScreenSpot-Pro. Under the same backbone, DRS-GUI achieves the best overall performance among zoom-in methods, which supports our claim that MCTS-based dynamic perceptual planning is more robust than one-way, non-revisable zoom-in strategies. DRS-GUI also outperforms recent methods such as Aguis-7B, despite requiring no model-specific training.

Moreover, the gains remain substantial when DRS-GUI is applied to stronger base agents such as UI-TARS-1.5-7B and Qwen3-VL-8B. This suggests that long-tail grounding failures still persist in high-resolution and element-dense GUIs, even for stronger models. As an inference-time plugin, DRS-GUI improves grounding by narrowing the perceptual scope and filtering out redundant context before the final prediction stage.

## 4. GUI Domain-specific Prompts

Before encoding, we prepend a domain-specific prefix to the user instruction so that UI elements are embedded in an application-aware semantic space. For each (application  $a$ , platform  $p$ ), the prompt follows a unified pattern: “*Repre-*

Table 3. Grounding accuracy comparison on ScreenSpot-Pro.

| Model                      | Dev         | Cre         | CAD         | Sci         | Office      | OS          | Avg         |
|----------------------------|-------------|-------------|-------------|-------------|-------------|-------------|-------------|
| <i>Zoom-in methods</i>     |             |             |             |             |             |             |             |
| Qwen2.5-VL-7B              | 26.1        | 24.0        | 13.0        | 31.1        | 45.2        | 23.5        | 26.8        |
| + <i>RegionFocus</i>       | 29.4        | 28.2        | 24.1        | 37.0        | 55.7        | 30.6        | 33.5        |
| + <i>UI-AGILE</i>          | 37.4        | 22.9        | 22.6        | 34.2        | 52.6        | 35.3        | 33.3        |
| + <i>DRS-GUI</i>           | <b>37.5</b> | <b>38.7</b> | <b>34.1</b> | <b>41.0</b> | <b>57.4</b> | <b>39.3</b> | <b>40.9</b> |
| <i>Stronger GUI agents</i> |             |             |             |             |             |             |             |
| UI-TARS-1.5-7B             | 38.5        | 39.3        | 22.2        | 53.1        | 68.7        | 33.2        | 42.1        |
| + <i>DRS-GUI</i>           | <b>47.5</b> | <b>46.3</b> | <b>43.3</b> | <b>56.7</b> | <b>71.7</b> | <b>45.4</b> | <b>51.3</b> |
| Qwen3-VL-8B                | 52.8        | 49.1        | 49.0        | 56.7        | 75.2        | 50.5        | 55.0        |
| + <i>DRS-GUI</i>           | <b>57.9</b> | <b>56.3</b> | <b>60.5</b> | <b>63.0</b> | <b>76.5</b> | <b>61.7</b> | <b>62.0</b> |
| <i>Recent methods</i>      |             |             |             |             |             |             |             |
| Aguvis-7B                  | 16.1        | 21.4        | 13.8        | 34.6        | 34.3        | 19.4        | 22.9        |
| GUI-R1-7B                  | 27.8        | 26.1        | 19.6        | 36.6        | 51.3        | 30.7        | 31.3        |

sent this UI element for semantic matching with the user instruction in a  $\text{Desc}(a, p)$  interface. Typical elements in this interface include:  $\mathcal{K}_{a,p}$ ” where  $\text{Desc}(a, p)$  is a short descriptor (e.g., “Photoshop Windows element”) and  $\mathcal{K}_{a,p}$  is a small set of UI-related keywords (e.g., layer panel, timeline, command palette). All concrete (application, platform, keyword) combinations used in our experiments are listed in Table 4. For screenshots that do not match any row, we fall back to application-only, platform-only, or a generic GUI prompt while keeping the same construction scheme.

## 5. More qualitative results

We provide additional visualizations of the MCTS-based perceptual planning process on real-world Windows desktop applications. These examples illustrate how DRS-GUI performs search-before-predict by expanding a perceptual tree with FOCUS, SCATTER, and SHIFT, and then selecting the most instruction-relevant region for the final grounding model. Figure 2 presents a MATLAB case, and Figure 3 presents a PowerPoint case. In both examples, DRS-GUI starts from the full screenshot and progressively refines the search trajectory into a compact region with reduced visual redundancy. These cases show that the proposed planner produces interpretable search behavior across different GUI layouts and application domains.

Table 4. Application- and platform-aware keyword sets  $\mathcal{K}_{a,p}$  used in the domain-specific prompts. We keep a shared set of application-level semantic anchors and introduce platform-specific cues only when the UI terminology or layout conventions differ across systems.

| Application $a$ | Platform $p$ | Domain cues $\mathcal{K}_{a,p}$                                                            |
|-----------------|--------------|--------------------------------------------------------------------------------------------|
| MATLAB          | macOS        | command window; workspace browser; plot toolbar; function editor; app designer             |
| MATLAB          | Windows      | command window; workspace panel; plot toolbar; function editor; toolbar                    |
| Origin          | Windows      | worksheet panel; graph toolbar; fitting dialog; statistics panel; analysis menu            |
| Stata           | Windows      | data editor; command window; results viewer; variable manager; graph editor                |
| EViews          | Windows      | workfile window; equation editor; forecasting dialog; series view; model dialog            |
| SolidWorks      | Windows      | feature tree; sketch toolbar; assembly panel; drawing view; design library                 |
| AutoCAD         | Windows      | ribbon panel; command line; layer manager; block library; dimension tool                   |
| Inventor        | Windows      | browser panel; sketch constraint; assembly tool; drawing view; simulation panel            |
| Blender         | Windows      | outliner panel; modifier stack; shader editor; timeline; render properties                 |
| Blender         | macOS        | outliner panel; modifier stack; node editor; timeline; render settings                     |
| Blender         | Linux        | scene outliner; geometry nodes; material editor; timeline; compositor                      |
| Unreal Engine   | Windows      | content browser; blueprint editor; level viewport; details panel; world outliner           |
| Vivado          | Windows      | project navigator; synthesis settings; implementation flow; IP catalog; timing constraints |
| Vivado          | Linux        | flow navigator; synthesis settings; implementation flow; IP integrator; XDC constraints    |
| Quartus Prime   | Windows      | project navigator; compilation flow; pin planner; timing analyzer; signal tap              |
| Premiere Pro    | Windows      | timeline panel; effect controls; media browser; source monitor; export dialog              |
| Premiere Pro    | macOS        | timeline panel; effect controls; media browser; source monitor; export dialog              |
| DaVinci Resolve | macOS        | color panel; node editor; fairlight mixer; timeline; deliver page                          |
| DaVinci Resolve | Windows      | color panel; node editor; audio mixer; timeline; render settings                           |
| FL Studio       | Windows      | channel rack; mixer; piano roll; playlist; plugin browser                                  |
| Photoshop       | Windows      | layer panel; adjustment panel; filter gallery; brush preset; selection tool                |
| Photoshop       | macOS        | layer panel; adjustment panel; filter menu; brush preset; selection tool                   |
| Illustrator     | Windows      | artboard panel; pen tool; appearance panel; gradient editor; symbols panel                 |
| Illustrator     | macOS        | artboard panel; pen tool; appearance panel; gradient panel; symbols panel                  |
| Word            | macOS        | ribbon tab; style pane; review tools; references panel; formatting inspector               |
| Word            | Windows      | ribbon tab; style pane; track changes; references panel; page layout                       |
| Excel           | macOS        | ribbon tab; formula bar; pivot table; chart tools; data validation                         |
| Excel           | Windows      | ribbon tab; formula bar; pivot table; conditional formatting; data tools                   |
| PowerPoint      | Windows      | slide pane; animation pane; transition tools; design theme; slide master                   |
| PowerPoint      | macOS        | slide pane; animation pane; transition tools; theme variants; slide master                 |
| VS Code         | macOS        | command palette; explorer sidebar; debug console; integrated terminal; extensions view     |
| VS Code         | Windows      | command palette; explorer panel; debug console; integrated terminal; extensions view       |
| VS Code         | Linux        | command palette; file explorer; debugger panel; terminal; extensions view                  |
| PyCharm         | macOS        | project panel; run configuration; debugger; python console; structure view                 |
| PyCharm         | Windows      | project panel; run configuration; debugger; python console; structure view                 |
| Android Studio  | macOS        | project panel; layout editor; logcat; build variants; device manager                       |
| Android Studio  | Windows      | project panel; XML editor; logcat; gradle tools; device manager                            |
| VMware          | macOS        | virtual machine library; settings panel; snapshot manager; network adapter; shared folders |
| VMware          | Windows      | virtual machine library; settings panel; snapshot manager; network editor; shared folders  |
